# Supplementary material
Source: Springer Nature journal article supplement (https://www.springermedizin.de/resource/supplementary/12943_2008_351_MOESM1_ESM.pdf/9553990)

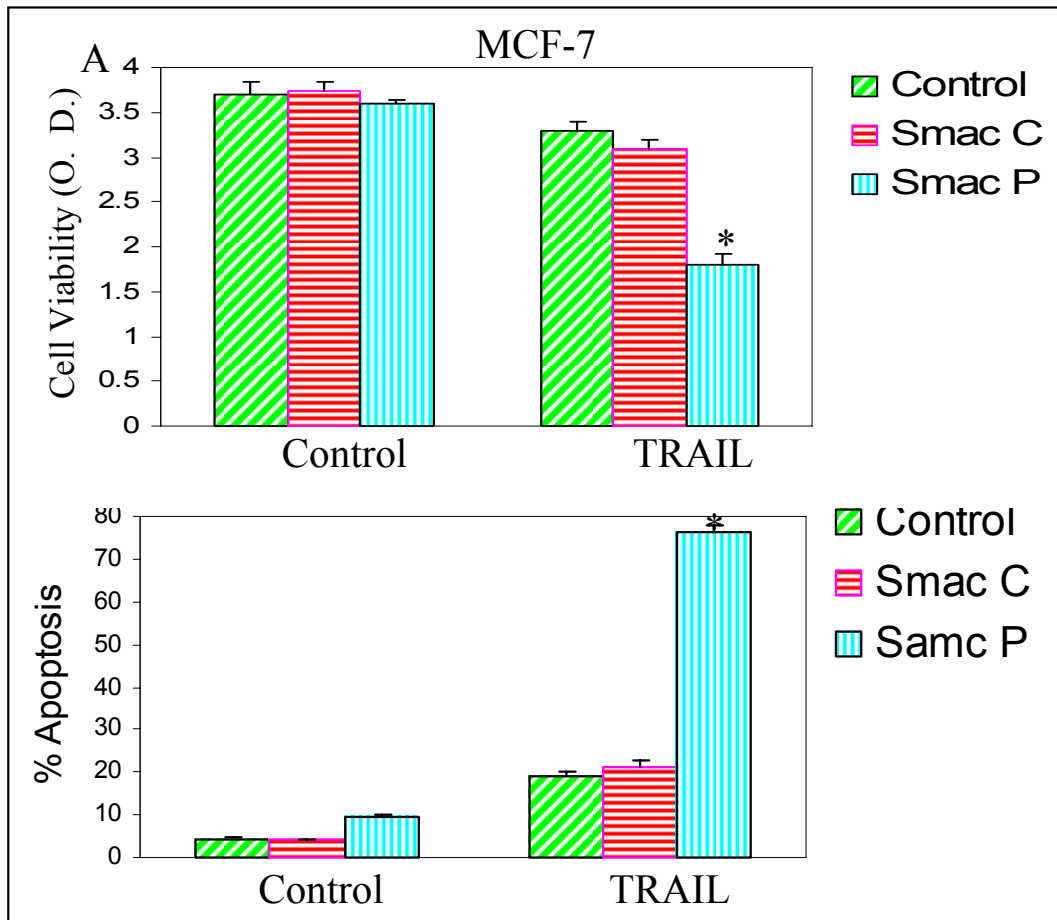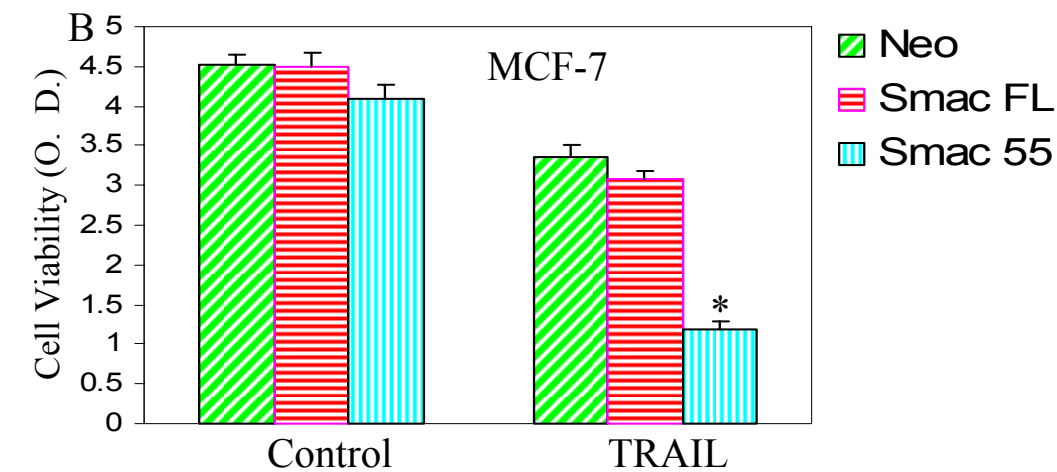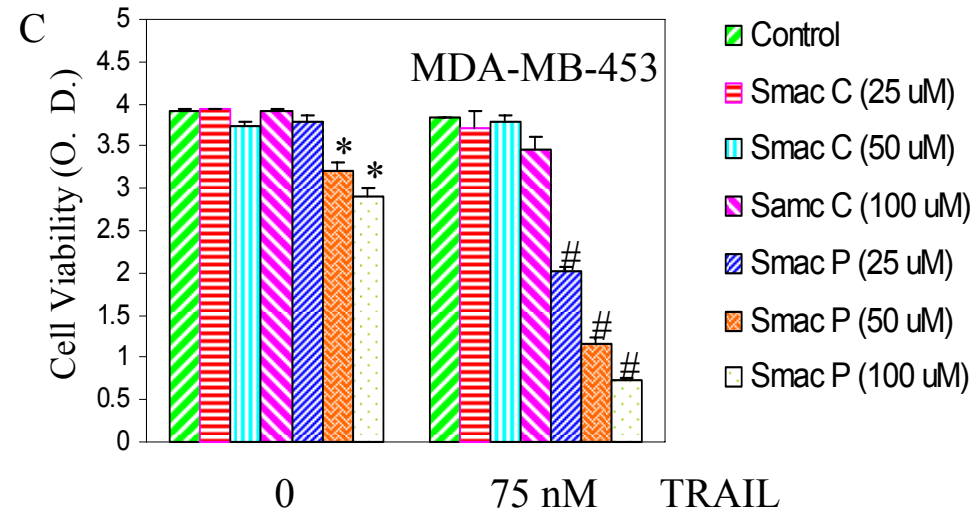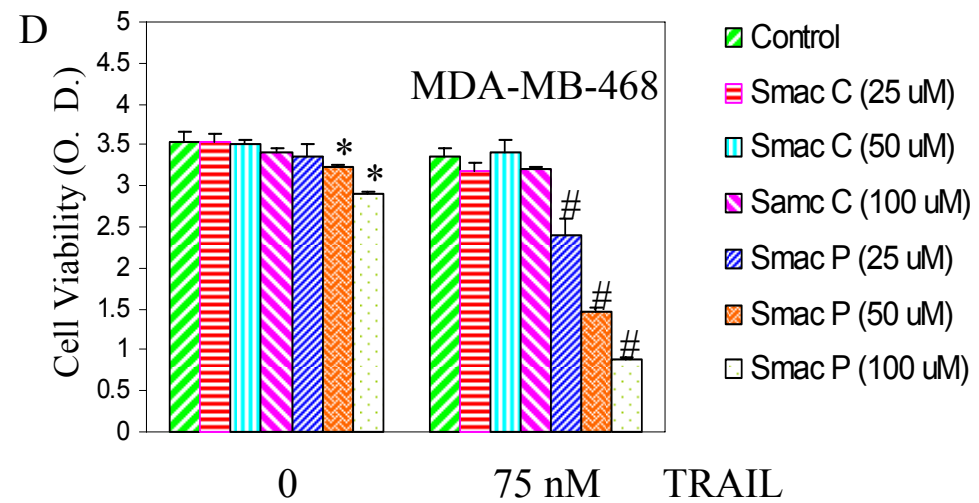

Supplement: MOESM1 [file 9553990]
